1 **Title:**

2 Pathogen dependent phenotypic but no genetic correlation between sexual activity and  
3 immunity in male *Drosophila melanogaster* subjected to differential sexual selection.

4 **Running title:**

5 Immunity and sexual selection in *Drosophila*

6 **Authors:**

7 Zeeshan Ali Syed, Vanika Gupta\*, Manas Arun Samant, Aatashi Dhiman, Nagaraj Guru Prasad

8 **The authors' institutional affiliations where the work was conducted:**

9 Indian Institute of Science Education and Research Mohali  
10 Sector-81, Knowledge city, SAS Nagar, Manauli PO. Mohali – 140306

11 **Corresponding Author Contact Details:**

- 12 1. Dr. NG Prasad  
13 Indian Institute of Science Education and Research Mohali  
14 Sector-81, Knowledge city, SAS Nagar, Manauli PO. Mohali – 140306  
15 Email: [prasad@iisermohali.ac.in](mailto:prasad@iisermohali.ac.in)  
16 2. Zeeshan Ali Syed  
17 Indian Institute of Science Education and Research Mohali  
18 Sector-81, Knowledge city, SAS Nagar, Manauli PO. Mohali – 140306  
19 Email: [syedzeeshanali@iisermohali.ac.in](mailto:syedzeeshanali@iisermohali.ac.in)

20 **Author contributions:**

21 SZA, VG, and NGP thought of the study. ZSA, VG, AD and MAS conducted the experiments and  
22 collected data, ZSA and VG analysed the data. All authors contributed in writing and reviewing the  
23 manuscript.

24 **Acknowledgments:**

25 The authors would like to thank Ms Radhika Ravikumar and Ms Saudamini Venkatesan for helpful  
26 comments on the manuscript; Mr. Nagendra Kumar for assistance with equipment and members of the  
27 Evolutionary Biology Lab, IISER Mohali for helping out with experiments and population  
28 maintenance. ZSA, MAS and VG thank Council for Scientific and Industrial Research, Govt of India  
29 for Junior and Senior Research Fellowships. AD thanks Department of Science and Technology,  
30 Govt. of India for INSPIRE fellowship. All authors thank IISER Mohali for lab and logistic support.

31 **Conflict of Interest Statement:** The authors have no conflict of interest.

32 **Data archival location upon acceptance:** Dryad

33 \* Current address: Department of Entomology, 3125 Comstock Hall, Cornell University,  
34 Ithaca, NY 14853, USA

35

36 **Abstract:**

37 The theory of trade-off suggest that limited resources should lead to trade-off in resource  
38 intensive traits such as immunity related and sexually selected traits in males. Alternatively,  
39 sexual exaggerations can also act as an honest indicator of underlying immunocompetence,  
40 leading to positive correlations between these traits. Several studies have addressed this  
41 question using experimental evolution. However, they have rarely used ecologically relevant  
42 pathogens and fitness measurement (e.g., measuring post-infection survivorship) to find  
43 correlations between sexual selection and immunity. Here we attempt to address this caveat  
44 by evolving populations of *Drosophila melanogaster* under differential sexual selection.  
45 After more than hundred generations, we infected virgin and mated males from each  
46 population with three pathogenic bacteria: *Pseudomonas entomophila* (Pe), *Staphylococcus*  
47 *succinus* (Ss) and *Providentia rettgeri* (Pr). Fitness was measured as either post-infection  
48 survivorship (Pe and Ss) or bacterial clearance ability (Pr). Contrary to expectations, sexual  
49 selection had no evolutionary effect on male fitness against any of the pathogens. Moreover,  
50 mating had a beneficial effect against Pe and Pr, but no effect against Ss, suggesting pathogen  
51 specific phenotypic correlations between mating and immunity. Following these results, we  
52 discuss the significance of using ecologically relevant pathogens and quantifying host fitness  
53 while studying sexual selection-immunity correlations.

54 **Keywords:** Sexual activity, Sexual selection, Immunity, trade-off, experimental evolution,  
55 drosophila.

56

57 **Introduction:**

58 Two of the most important classes of traits that determine a male's fitness are sexually  
59 selected traits, (i.e., traits which enable males to outcompete rivals in siring progeny) and,  
60 immunity related traits (i.e., traits which enable them to withstand pathogenic attack). Both  
61 sets of traits are resource intensive in their maintenance and deployment and, as life history  
62 theory suggests, are expected to trade-off with other life history related traits as a  
63 consequence (Stearns 1992). Traits such as longevity, stress resistance, fecundity etc. have  
64 been shown to trade-off with both immunity (Sheldon and Verhulst 1996; Moret *et al* 2000;  
65 Ye *et al* 2009; Ma *et al* 2012) and sexually selected traits (Johnston *et al* 2013; Nandy *et al*  
66 2013). Such trade-offs are widespread, although not universal (e.g., Gupta *et al* 2016; Faria *et*  
67 *al*, 2015, Fricke and Arnqvist 2007), and are important in our understanding of why genetic  
68 variation exists in life history traits in the face of strong directional selection.

69 Following the idea of trade-offs, sexually selected and immunity related traits are also  
70 expected to trade-off with each other. Additionally, in males, such trade-offs can be apparent  
71 only with reproductive effort because several traits under sexual selection (such as courtship  
72 display and mating calls) manifest under the specific context of mating. Thus, populations  
73 undergoing differential levels of sexual selection might have differential effect of mating in  
74 their response to pathogenic infections. As an alternative possibility, to explain the results  
75 that deviated from the classical trade-off model, Hamilton and Zuk (1982) proposed that  
76 sexually selected traits in males might reflect their underlying immunocompetence, and  
77 therefore the two traits will be positively correlated. Studies addressing genetic correlation  
78 between mating and immunity in vertebrates have been the focus of much research following  
79 their pioneering work (Møller 1990; Balenger and Zuk 2014).

80 Due to the relatively simple immune system and small generation time of many invertebrate  
81 model organisms, it is possible to design tractable experimental evolutionary studies to test

82 either hypotheses (Lawniczak et al. 2007). Phenotypic correlation between reproductive  
83 investment in males and several components of immunity has been studied in many  
84 invertebrate species. In wolf spiders, males presented with females increase their drumming  
85 rates at a cost of lytic activity (LA) (Ahtiainen *et al.* 2005). Negative correlations between  
86 encapsulation rate (EN), and, both call syllable number and spermatophore size were shown  
87 in bush crickets (Barbosa *et al.* 2016). In decorated crickets, artificial induction of  
88 spermatophore production traded off with phenoloxidase activity (PO) and LA (Kerr *et al.*  
89 2010). Induction of immune system through lipopolysaccharide injection resulted in the  
90 reduction of their daily call rate (Jacot *et al.* 2005). In a more direct assay of immunological  
91 cost of mating, McKean and Nunney (2001) showed that increased sexual activity decreased  
92 the ability to clear non-pathogenic bacteria *E. coli* in male *Drosophila melanogaster*.  
93 Conversely, Gupta *et al.* (2013) found that mating increased ability to survive infection and  
94 clear the natural pathogen *Pseudomonas entomophila* in three unrelated populations of male  
95 *Drosophila melanogaster*. Similar results have also been found in bumblebees (Barribeau and  
96 Schmidt-Hempel 2016) and mealworm beetles (Valtonen *et al.* 2010).

97 Simmons *et al.* (2010) calculated quantitative genetic variation in immunity related and  
98 sexually selected traits in the Australian cricket *Teleogryllus oceanicus* using half-sib  
99 analysis and found negative genetic correlation between these two sets of traits. McKean and  
100 Nunney (2008), using experimental evolution altered the intensity of sexual selection in  
101 laboratory populations of *Drosophila melanogaster* by skewing the sex ratio towards males.  
102 Higher sexual selection imposed on males resulted in lesser ability to clear the bacteria *E.*  
103 *coli*. In the yellow dung fly, *Scathophaga stercoraria*, removal of sexual selection through  
104 monogamy results in increased PO activity but that did not translate into increased  
105 antibacterial effect *in vitro* (Hosken 2001). In *Tribolium castaneum* similar removal of  
106 sexual selection did not result in difference in either PO or their ability to survive the

107 infection by the pathogenic microsporidian *Paranosema whitei* (Hangartner *et al* 2015).  
108 Thus, the evolutionary relationship between sexually selected traits and immunity, at least in  
109 invertebrates is unclear.

110 A “recurring theme” in a lot of the above mentioned studies, as observed by Lawniczak *et al.*  
111 (2007), is the lack of a fitness oriented experimental framework. Differences in molecular  
112 readouts (such as gene expression, PO and LA) do not always translate into fitness  
113 differences (e.g., Hangartner *et al* 2015). This leads to a dissonance between potential  
114 immunity (gene expression, PO, LA etc.) and realized immunity (actual ability to survive  
115 pathogenic infection) (Fedorka *et al* 2007). One way of incorporating fitness is to evolve host  
116 populations under different levels of sexual selection, and then measure their fitness (e.g.,  
117 survivorship) against pathogenic infection. That said, even the supposedly simple immune  
118 system of invertebrates is in fact not that simple, with several studies showing pathogen  
119 specificity (Sadd and Schmid-Hempel 2009), immune memory (Kurtz 2005), and  
120 transgenerational immune priming (Sadd *et al* 2005). The pathogen(s) that a host is being  
121 exposed to constitute an important part of the host’s ecological context and can play a non-  
122 trivial role in determining the outcome of the interaction between reproductive investment  
123 and realized immunity. If the same host responds through different immune mechanisms to  
124 different pathogens (i.e., specificity), mating may have differential effect on host ability to  
125 combat different infections. For example, Gupta *et al.* (2013) showed that males from the  
126 same populations of *Drosophila melanogaster* that showed increased resistance against  
127 *Pseudomonas entomophila* upon mating, did not show any effect of mating when challenged  
128 with *Staphylococcus succinus*. This argument can be extended to the evolutionary effect of  
129 sexual selection in males on their immune response as well. Therefore, in order to assess  
130 these relationships, it is important to measure host fitness against different ecologically  
131 relevant pathogens. However, such studies are conspicuous by their absence.

132 In this study we try to address this issue by evolving replicate populations of *Drosophila*  
133 *melanogaster* under increased and decreased levels of sexual selection for more than a  
134 hundred generations. Alteration of sexual selection was achieved by maintaining the  
135 populations under male biased (M) or female biased (F) operational sex ratio regimes.  
136 Previous studies have shown that males in these populations have diverged in terms of their  
137 reproductive traits, such as courtship and locomotor activity, and, sperm competitive ability  
138 (Nandy et al 2013 a,b). We subjected the males from both regimes to infection by three  
139 ecologically relevant bacteria –*Pseudomonas entomophila* (Pe), *Staphylococcus succinus*  
140 (Ss), and *Providencia rettgeri* (Pr) in three different assays. To address the effect of mating,  
141 in each of the assays, we had two groups of males from each selection regime – virgin and  
142 sexually active. We used survivorship post infection as a measure of fitness in two of the  
143 assays (Pe and Ss), and ability to clear bacteria in the third (Pr). We predicted that a common  
144 correlation between sexual selection and immunity (physiological and/or genetic) would  
145 produce similar differences in fitness between M and F males across all three assays, whereas  
146 pathogen dependency would produce different results for different pathogens.

#### 147 **Materials and Methods:**

##### 148 **Ancestral populations:**

149 The two ancestral populations used in this study are called LH and LH<sub>st</sub>, both of which are  
150 large laboratory adapted populations of *Drosophila melanogaster*. The LH population was  
151 established with 400 gravid wild caught females and is maintained at an adult census size  
152 >5000 (Chippindale and Rice 2001). LH<sub>st</sub> was derived by introgressing a benign autosomal  
153 ‘scarlet eye’ marker to the LH genetic background and is maintained at an adult census size  
154 >2500. The LH and LH<sub>st</sub> populations are genetically equivalent except for one locus which  
155 has no discernible effect on their fitness (Bodhi thesis or some other ref?). The LH<sub>st</sub>

156 population is periodically back crossed with LH population to prevent divergence between  
157 the two populations (Prasad *et al.* 2007). Both populations are maintained at standard  
158 laboratory conditions (temperature =  $25 \pm 1^\circ\text{C}$ , relative humidity  $\approx 60\%$ , 12:12 dark: light  
159 cycle) on corn-meal molasses food. Detailed population maintenance is described in Nandy *et*  
160 *al.* (2012). Briefly, in a given generation, 2-3 day-old adult flies from rearing vials (95 mm  
161 height  $\times$  25 mm diameter) are mixed and redistributed into fresh food vials with 16 males and  
162 16 females in each and containing a limiting quantity of dried yeast granules. The flies are  
163 kept there for two days after which they are allowed to oviposit for 18 hrs in fresh vials with  
164 food. These vials are controlled for egg density ( $\sim 150$  eggs /vial) and incubated to start the  
165 next generation.

#### 166 **Selection regimes:**

167 The selection regimes are derived from  $\text{LH}_{\text{st}}$ . Initially three populations,  $\text{C}_{1-3}$ , were derived  
168 and maintained for 5 generations. The maintenance of the C populations differed from that of  
169  $\text{LH}_{\text{st}}$  in that adult males and females were collected as virgins and held in same-sex vials with  
170 8 individuals/vial and combined in 1:1 sex ratio (16 males and 16 females) once they were 2-  
171 3 days old with measured amount of live yeast instead of granules. Thereafter the  
172 maintenance protocol is the same as that of  $\text{LH}_{\text{st}}$ . After 5 generations, two more selection  
173 regimes,  $\text{F}_{1-3}$  and  $\text{M}_{1-3}$ , were derived from each of the C populations where operational sex  
174 ratios were biased towards males and females respectively. In these populations, 2-3 day-old  
175 virgin adults were combined in their respective sex ratios (i.e., 1Male:3Females for F  
176 populations and, 3Males:1Female for M populations). Note that the populations sharing the  
177 same subscript share a common ancestry and are handled simultaneously, independent of  
178 those having a different subscript. Thus each subscript constitutes a “statistical block”.  
179 Details of maintenance and selection history are described in Nandy et al (2013).

180 **Standardization:**

181 Nongenetic parental effects (Rose 1984) can lead to misinterpretation of multi-generation  
182 selection experiment results. To equalize such effects across selection regimes, all selected  
183 populations were passed through one generation of standardization where selection was  
184 removed, i.e., they were maintained in ancestral conditions (Syed et al 2016). Adult progeny  
185 produced by this generation were used for the experiment.

186 **Bacterial culture**

187 We used three pathogens for this study: gram negative bacteria *Providencia rettgeri* (Short  
188 and Lazzaro 2013), gram negative bacteria *Pseudomonas entomophila* L48 (Vodovar et al.  
189 2005), and gram positive bacteria *Staphylococcus succinus* subsp. *Succinus*, strain PK-1 (Ss)  
190 (Singh et al. 2016). All three bacteria are natural isolates obtained from wild caught  
191 *Drosophila*. For making the bacterial suspension for infections, bacterial culture was grown  
192 at 27°C (Pe) and 37°C (Ss and Pr) till  $OD_{600} = 1.0 \pm 0.1$  from a glycerol stock maintained  
193 at -80°C. Following this, cells were pellet down and suspended in equal volume of 10 mM  
194 MgSO<sub>4</sub> before infection. For Pr, the suspension was concentrated to  $OD_{600} = 2.0 \pm 0.1$  before  
195 infection.

196 **Infection protocol:**

197 Flies were put under light CO<sub>2</sub> anaesthesia and infected by pricking with a needle (*Minutein*  
198 *pin* 0.1 mm, Fine Science Tools, CA) dipped in bacterial suspension (bacteria suspended in  
199 10 mM MgSO<sub>4</sub>) in the thorax (Gupta et al 2013). To control for injury, a separate set of flies  
200 were pricked with a tungsten needle dipped in sterile 10 mM MgSO<sub>4</sub> (sham).

201 **Experimental Treatments:**



202 Experimental males were collected within 6 hours of eclosion from pupae, which ensured  
203 their virginity, since in these populations it takes the flies ~8 hours to attain sexual maturity.  
204 These males were kept in vials provided with corn-meal molasses food at a density of 8 males  
205 per vial. On 12<sup>th</sup> day post egg collection (i.e., 2-3 day-old adult) flies from each selection  
206 regime were randomly assigned to two groups: ‘Virgin’ and ‘Mated’.

207 In the Virgin treatment, virgin males were transferred to vials containing fresh food as they  
208 were. In the Mated treatment, males from each vial were combined with virgin LH<sub>st</sub> females  
209 (8 / vial). For infection and sham, 10 (n = 80) and 5 (n= 40) vials were set up per treatment  
210 per selection regime per block respectively for each of the pathogens. All pricking was done  
211 on 14<sup>th</sup> day post egg collection and were transferred to vials containing fresh food following  
212 infection. Males in the ‘mated’ treatment were separated from females while anaesthetized  
213 for pricking and were maintained in single sex vials.

214

#### 215 **Measure of infection response:**

216 For Pe and Ss response to pathogenic infection was measured in terms of survivorship post  
217 infection by observing vials for mortality every three hours post infection for ~100 hours post  
218 infection. For Pr, since mortality was low (<5%) and did not differ from the sham control,  
219 response was measured as the ability of the host to clear bacteria using the method described  
220 in Gupta et al (2013). Briefly, 20 hours post infection, 6 flies from each vial was sampled  
221 randomly and divided into groups of three. They were then crushed using a mortar inside  
222 micro-centrifuge tubes containing 100  $\mu$ L MgSO<sub>4</sub> and plated on LB-Agar plates using an  
223 automated spiral plater (WASP spiral plater, Don Whitley Scientific, UK). Three replicate  
224 plates were plated from each group of three flies. After growing the bacteria in their  
225 respective optimum temperatures, CFUs were counted using a plate reader (Acolyte colony

226 counter, Don Whitley Scientific, UK). Average CFUs per fly obtained from each group was  
227 used as unit of analysis.

## 228 **Statistical Analyses:**

229 All analyses were performed in R (R core team 2015). Survivorship (for Pe and Ss) was  
230 analysed using Cox's Proportional hazards model. Death was recorded for each fly and flies  
231 not dead till the last time were treated as censored data. For each of the pathogens, data were  
232 modelled either using block as a random factor or excluding Block using R package "Coxme"  
233 (Therneau 2012) using the following two expressions:

234 Model 1:  $\sim$ Selection\_Regime \* Mating\_Status + (1 | Block/Selection\_Regime)

235 Model 2:  $\sim$ Selection\_Regime \* Mating\_Status

236

237 Since analysis of deviance revealed no effect of block (analysis of deviance test:  $\chi^2_2 = 4.31$ ,  $p$   
238  $= 0.12$  for Pe;  $\chi^2_2 = 2.61$ ,  $p = 0.27$  for Ss), data from all three blocks were pooled and the  
239 cumulative data were then tested for difference in survivorship. We compared the Cox partial  
240 likelihood (log-likelihood) estimates across treatments and selection regimes.

241 Test for the effect of mating status and selection on number of CFUs (in case of Pr), colony  
242 count data was natural log transformed. Normality was verified using Shapiro – Wilk test.

243 The data were then subjected to ANOVA (with Satterthwaite approximation for degrees of  
244 freedom) where mating status and selection regimes were used as fixed factors and block as a  
245 random factor. This was performed using package "lme4" (Bates et al. 2011).

246 Post-hoc pairwise comparisons using Tukey's HSD method was performed with the package  
247 "lsmeans" (Lenth 2016). All data are archived in Dryad data repository.

248 **Results**

249 For survival analysis, we compared the Cox partial likelihood (log-likelihood) estimates.  
250 Mating had a significant effect on survival against Pe (Table 1a). Pairwise comparisons  
251 showed that mated males survived better than virgins in both M and F regimes ( $p < 0.001$ ,  
252 Figure 1). However, there was no effect of selection or selection  $\times$  mating status interaction.  
253 This indicates that sexual selection had no effect on survival on either virgin or mated males.  
254 Similarly, against Pr, we found a significant effect of mating, but no selection  $\times$  mating  
255 interaction effect (Table 1c). Here again, post-hoc analysis (Tukey adjusted p) showed that  
256 mated males were able to clear more bacteria compared to virgins in both M ( $p = 0.045$ ) and F  
257 ( $p = 0.015$ ) regimes (Figure 2). There was no effect of either mating, selection regime or  
258 selection  $\times$  mating interaction on survivorship against infection by Ss (Figure 3, Table 1b).

259 **Discussion:**

260 Here we show, using *Drosophila melanogaster* and three different ecologically relevant  
261 pathogens – *Pseudomonas entomophila* (Pe), *Providencia rettgeri* (Pr) and *Staphylococcus*  
262 *succinus* (Ss), that mating affects the host's ability to survive or clear bacterial infection in a  
263 pathogen dependent manner. Further, we used experimental evolution in the same system to  
264 show that even after going through more than a hundred generations of differential sexual  
265 selection, populations of *Drosophila melanogaster* did not differ in either their ability to  
266 fight pathogenic infection or the effect of mating on their ability to fight pathogenic infection.

267 **No effect of sexual selection on immune response:**

268 Males from M and F regimes were not different from each other in terms of either post  
269 infection survivorship (against Pe and Ss) or bacterial clearance ability (against Pr), given  
270 that they were from the same mating treatment (mated or virgin). Our results differ from that

271 of McKean and Nunney (2008), who measured host's ability to clear *E.coli* as a proxy for  
272 immune response, and found a trade-off with sexual selection. This shows that relations  
273 between multi-locus traits such as immunity related traits and traits under sexual selection  
274 can be complex and may not follow a simple "Y- model" of trade-off (Stearns 1992). Several  
275 other studies have measured one or a few components of immunity, such as phenoloxidase  
276 activity and found them to be negatively correlated with the intensity of sexual selection  
277 (Hosken 2001, Hangartner *et al* 2015). However, such studies that measure one (or a few)  
278 component of immunity to assay the effect of sexual selection on immunity can have certain  
279 drawbacks. Different components of the immune system can have their own internal  
280 correlations. For example, negative genetic correlation between resistance and tolerance has  
281 been reported in a mice-*Plasmodium chabaudi* system (Råberg *et al.* 2007). Within-immune  
282 system trade-offs have also been found in female white-footed Mice, *Peromyscus leucopus*  
283 (Martin *et al.* 2007). Therefore measuring just one or a few of them can lead to incomplete  
284 and perhaps misleading conclusions about the genetic correlations between immunity and  
285 sexual selection. Furthermore, some of these components might have no fitness consequence.  
286 Leclerc *et al.* (2006) found that in *Drosophila melanogaster*, mutants that failed in producing  
287 active phenoloxidase had equal survivorship compared to wild type flies against pathogenic  
288 infection by different species of fungi and, both gram positive and negative bacteria. This  
289 implies that in flies, phenoloxidase activity is probably unnecessary for survival against a  
290 wide variety of microbes (Leclerc *et al.* 2006). Similarly, Hosken (2001) found that removal  
291 of sexual selection resulted in increased PO activity in males which, however did not result in  
292 increased antimicrobial activity. Thus, while measuring components of immunity is important  
293 for understanding the functional basis, it's the fitness consequence that ultimately drives the  
294 evolution of a trait, and it is therefore important to measure immunity in that context. In the  
295 present case, we have used three different natural isolates of *D. melanogaster* and showed

296 that neither survival nor bacterial clearance ability changes in response to differential levels  
297 of sexual selection, providing persuasive evidence that in this system response to sexual  
298 selection has not been traded-off with investment in immune response.

299 **Phenotypic effect of reproduction on immunity depends on pathogen:**

300 We found that mated males from both M and F regimes had better survivorship and bacterial  
301 clearance abilities against Pe and Pr respectively. We have previously shown that in the  
302 population ancestral to the selection lines used here, mating had a beneficial effect on  
303 resistance against Pe (Gupta *et al.* 2013). Our results corroborate with those of Valtonen *et al.*  
304 (2010) and, Barribeau and Schmidt-Hempel (2016) who also found that mating can be  
305 beneficial against infections. However they are in contrast with McKean and Nunney (2001)  
306 in that, unlike this study, we found no evidence of trade-off between mating and immunity in  
307 terms of either survival, or bacterial clearance. Phenotypic relationships between multi-  
308 component traits such as immune response (with mutually non-exclusive components such as  
309 resistance, tolerance, memory etc.) and reproduction (with components such as acquisition of  
310 mates, production of sperm and accessory gland proteins etc.) is complex – even  
311 invertebrates like fruit flies show great variety and pathogen specificity in their response to  
312 infections. Thus, measuring such relationships is expected to depend upon the pathogens. The  
313 fact that we find no difference in survivorship between mated and virgin males against a third  
314 pathogen, Ss (flies used randomly from the same experimental pool, see methods.), further  
315 highlights this issue.

316 **Evolutionary response does not mirror phenotypic correlation:**

317 McKean and Nunney (2008) showed that increased sexual selection resulted in evolved  
318 populations of *Drosophila melanogaster* where males had exaggerated sexually selected  
319 traits, but had reduced ability to clear the non-pathogenic bacteria *E. coli*. This mirrored the

320 phenotypic trade-off they found between mating and immunity (McKean and Nunney, 2001,  
321 2008). Our results differ from McKean and Nunney (2008) in that we did not find any  
322 phenotypic trade-off. Quite contrarily, for Pe and Pr we found that mated males had higher  
323 survivorship and bacterial clearance ability respectively. Thus, this did not mirror the genetic  
324 correlations, where males from both M and F regimes had equal ability to survive infection or  
325 clear bacteria within a given mating treatment. The most likely explanation is that,  
326 phenotypic correlations do not necessarily mirror genetic correlations (Chippindale *et al.*  
327 1997). Expression of immunological reaction to infection and sexually selected traits (such as  
328 aggressiveness towards rival males, courtship display, production of sperm and accessory  
329 gland proteins) depend on the condition of the condition of the organism, which can be  
330 affected by factors such as age, developmental conditions, resource availability etc (Stearns et  
331 al., 1991). Therefore these factors might impact the correlations between these traits through  
332 Genotype  $\times$  Environment interactions. For example, in *Drosophila melanogaster*, Genetic  
333 correlations between immunity and other life history related traits have been found to be  
334 dependent upon the host dietary condition (McKean *et al.* 2008) and temperature at which  
335 they were maintained (Lazzaro et al 2008). Therefore, it is possible the phenotypic and  
336 genetic relations between sexual selection and immune response might manifest in conditions  
337 that differ from their maintenance regime (such as resource limitation).

### 338 **Summary:**

339 Using three different pathogens of *Drosophila melanogaster*, we found no evolutionary effect  
340 of the intensity of sexual selection on the immunocompetence of males. This is in contrast  
341 with several previous studies (Zuk and Stoehr 2002; Schmid-Hempel 2003, McKean and  
342 Nunney 2008). We also show that mating can have beneficial or no effect on males  
343 depending upon pathogen. This adds to a growing body of studies that have used natural  
344 pathogens to show the beneficial effects of mating on hosts (Valtonen *et al.*, 2010, Gupta *et*

345 *al.* 2013, Barribeau and Schmidt-Hempel, 2016). Taken together, our study indicates that the  
346 complex relationship between reproductive investment and immune response might not  
347 manifest in the form of simple trade-offs. We also highlight the importance of ecologically  
348 relevant pathogens and incorporating host fitness, such as survival ability against infection in  
349 measuring such relationships.

## 350 **References:**

- 351 Ahtiainen, J., R. Alatalo, R. Kortet, and M. Rantala. 2005. A trade-off between sexual  
352 signalling and immune function in a natural population of the drumming wolf  
353 spider *Hygrolycosa rubrofasciata*. *J. Evol. Biol.* **18**:985–991.
- 354 B.M. Sadd and P. Schmid-Hempel Insect immunity shows specificity in protection upon  
355 secondary pathogen exposure *Curr. Biol.*, 16 (2006), pp. 1206–1210
- 356 Balenger, S.L. and M. Zuk. 2014. Testing the Hamilton–Zuk Hypothesis: Past, Present, and  
357 Future. *Integr Comp Biol.* **54**: 601-613.
- 358 Barbosa, F., D. Rebar, and M. Greenfield. 2015. Reproduction and immunity trade-offs  
359 constrain mating signals and nuptial gift size in a bushcricket. *Behavioral Ecology* **27**:109-  
360 117.
- 361 Bates, D., M Maechler, and B. Bolker. 2011. lme4: Linear mixed-effects models using S4  
362 classes. <http://CRAN.R-project.org/package=lme4>
- 363 Chippindale, A. K., and W. R. Rice. 2001. Y chromosome polymorphism is a strong  
364 determinant of male fitness in *Drosophila melanogaster*. *Proc. Natl. Acad. Sci. USA* **98**:5677–  
365 5682.

- 366 Chippindale, A. K., A. M. Leroi, H. Saing, D. J. Borash, and M. R. Rose 1997. Phenotypic  
367 plasticity and selection in *Drosophila* life history evolution. 2. Diet, mates and the cost of  
368 reproduction. *J. Evol. Biol.* **10**: 269–293.
- 369 Faria, V. G., N. E. Martins, T. Paulo, L. Teixeira, É. Sucena, and S.  
370 Magalhães. 2015. Evolution of *Drosophila* resistance against different pathogens and  
371 infection routes entails no detectable maintenance costs. *Evolution***69**:2799–2809.
- 372 Fricke, C., and G. Arnqvist. 2007. Rapid adaptation to a novel host in a seed beetle  
373 (*Callosobruchus maculatus*): the role of sexual selection. *Evolution***61**:440–454.
- 374 Gupta, V., Z. Ali, and N. Prasad. 2013. Sexual activity increases resistance  
375 against *Pseudomonas entomophila* in male *Drosophila melanogaster*. *BMC Evol.*  
376 *Biol.* **13**:185–196.
- 377 Hamilton, W. D., and M. Zuk. 1982. Heritable true fitness and bright birds: a role for  
378 parasites? *Science***218**:384–387.
- 379 Hangartner, S., Michalczyk, Ł., Gage, M. & Martin, O. 2015. Experimental removal of  
380 sexual selection leads to decreased investment in an immune component in female *Tribolium*  
381 *castaneum*. *Infect Genetics Evol* **33**: 212–218
- 382 Hosken, D. J. 2001. Sex and death: microevolutionary trade-offs between reproductive and  
383 immune investment in dung flies. *Curr. Biol.* **11**:R379–R380.
- 384 J. Kurtz Specific memory within innate immune systems *Trends Immunol.*, 26 (2005), pp.  
385 186–192



- 386 JACOT, A., H. SCHEUBER, J. KURTZ, and M. BRINKHOF. 2005. Juvenile immune status  
387 affects the expression of a sexually selected trait in field crickets. *Journal of Evolutionary*  
388 *Biology* **18**:1060-1068.
- 389 Johnston, S. E., J. Gratten, C. Berenos, J. G. Pilkington, T. H. Clutton-Brock, J. M.  
390 Pemberton, and J. Slate. 2013. Life history trade-offs at a single locus maintain sexually  
391 selected genetic variation. *Nature* **502**:93–96.
- 392 Kerr, A., S. Gershman, and S. Sakaluk. 2010. Experimentally induced spermatophore  
393 production and immune responses reveal a trade-off in crickets. *Behavioral Ecology* **21**:647-  
394 654.
- 395 Lawniczak, M. K., A. I. Barnes, J. R. Linklater, J. M. Boone, S. Wigby, and T.  
396 Chapman. 2007. Mating and immunity in invertebrates. *Trends Ecol. Evol.* **22**:48–55.
- 397 Lazzaro, B.P., H.A. Flores, J.G. Lorigan and C.P. Yourth. 2008. Genotype by environment  
398 interactions and adaptation to local temperature affect immunity and fecundity in *Drosophila*  
399 *melanogaster*. *PLoS Pathogens*. **4**:e1000025.
- 400 Leclerc, V., N. Pelte, L. Chamy, C. Martinelli, P. Ligoxygakis, J. Hoffmann, and J.  
401 Reichhart. 2006. Prophenoloxidase activation is not required for survival to microbial  
402 infections in *Drosophila*. *EMBO reports* **7**:231-235.
- 403 Lenth, R.V. 2016. Least-Squares Means: The R Package lsmeans. *Journal of Statistical*  
404 *Software*. **69** : 1-33.
- 405 Ma, J., A. Benson, S. Kachman, Z. Hu, and L. Harshman. 2012. *Drosophila melanogaster*  
406 selection for survival of *Bacillus cereus* infection: life history trait indirect responses. *Int. J.*  
407 *Evol. Biol.* doi 10.1155/2012/935970

- 408 McKean KA, and L. Nunney L. 2001 Increased sexual activity reduces male immune  
409 function in *Drosophila melanogaster*. *Proc Natl Acad Sci USA* **98**: 7904-7909.
- 410 McKean, K. & Nunney, L. 2008. Sexual selection and immune function in *Drosophila*  
411 *melanogaster*. *Evolution* **62**: 386–400.
- 412 McKean, K. A., C. P. Yourth, B. P. Lazzaro, and A. G. Clark. 2008. The evolutionary costs  
413 of immunological maintenance and deployment. *BMC Evol. Biol.* **8**:76
- 414 Møller, A. P. 1990, Parasites and sexual selection: Current status of the Hamilton and Zuk  
415 hypothesis. *J. Evol. Biol.*, **3**: 319–328.
- 416 Moret, Y., and P. Schmidt-Hempel. 2000. Survival for immunity: the price of immune system  
417 activation for bumblebee workers. *Science* **290**:1166–1168.
- 418 Nandy, B., A. Joshi, Z. S. Ali, S. Sen, and N. G. Prasad. 2012. Degree of adaptive male mate  
419 choice is positively correlated with female quality variance. *Sci. Rep.* **2**.  
420 doi:10.1038/srep00447.
- 421 Nandy, B., Gupta, V., Sen, S., Udaykumar, N., Samant, M. A., Ali, S. Z., & Prasad, N. G.  
422 2013. Evolution of mate-harm, longevity and behaviour in male fruit flies subjected to  
423 different levels of interlocus conflict. *BMC evolutionary biology* **13**: 1.
- 424 Nandy, B., P. Chakraborty, V. Gupta, S. Z. Ali, and N. G. Prasad. 2013. Sperm competitive  
425 ability evolves in response to altered operational sex ratio. *Evolution* **67**:2133–2141.
- 426 Prasad, N. G., S. Bedhomme, T. Day, and A. K. Chippindale. 2007. An evolutionary cost of  
427 separate genders revealed by male-limited evolution. *Am. Nat.* **169**:29–37.
- 428 R Core Team. 2015. R: A language and environment for statistical computing. R Foundation  
429 for Statistical Computing, Vienna, Austria. <https://www.R-project.org/>

- 430 Rantala, M. J., A. Vainikka, and R. Kortet. 2003. The role of juvenile hormone in immune  
431 function and pheromone production trade-offs: a test of the immunocompetence handicap  
432 principle. *Proc. R. Soc. Lond. B* **270**:2257–2261.
- 433 Rolff, J. 2002. Bateman's principle and immunity. *Proc. R. Soc. B* **269**: 867–872.
- 434 Rose, M. R. 1984. Laboratory evolution of postponed senescence in *Drosophila*  
435 *melanogaster*. *Evolution*. **38**:1004–1010.
- 436 Sadd, B.M. Kleinlogel, Y. , Schmid-Hempel, R., Schmid-Hempel, P. Trans-generational  
437 immune priming in a social insect Biol. Lett., 1 (2005), pp. 386–388
- 438 Schmid-Hempel, P. 2003. Variation in immune defence as a question of evolutionary  
439 ecology. *Proc. R. Soc. Lond. B* **270**:357–366.
- 440 Sheldon, B. C., and S. Verhulst. 1996. Ecological immunology: costly parasite defences and  
441 trade-offs in evolutionary ecology. *Trends Ecol. Evol.* **11**:317–321.
- 442 Short, S. M. and B.P. Lazzaro. 2013. Reproductive status alters transcriptomic response to  
443 infection in female *Drosophila melanogaster*. *G3: Genes/ Genomes/ Genetics*. **3**: 827–840.
- 444 Singh, K., M. Zulkifli, and N. G. Prasad. 2016. Identification and characterization of novel  
445 natural pathogen of *Drosophila melanogaster* isolated from wild captured *Drosophila*  
446 *spp.* *Microbes and infection* **18**: 813.
- 447 Stearns, S.C. 1992. *The Evolution of Life Histories*. Oxford University Press, New York.
- 448 Therneau, T. 2012. Coxme: mixed effects Cox models. R package version 2.2-3.  
449 <http://CRAN.R-project.org/package=coxme>

450 Vodovar, N., M. Vinals, P. Liehl, A. Basset, J. Degrouard, P. Spellman, F. Boccard, B. and  
 451 Lemaitre. 2005. *Drosophila* host defense after oral infection by an entomopathogenic  
 452 *Pseudomonas* species. *Proc. Nat. Acad. Sci. USA*, **102**(32):11414-11419.

453 Ye, Y., S. Chenoweth, and E. McGraw. 2009. Effective but costly, evolved mechanisms of  
 454 defense against a virulent opportunistic pathogen in *Drosophila melanogaster*. *PLoS*  
 455 *Pathog.* **5**:e1000385.

456 Zuk, M., and A. M. Stoehr. 2002. Immune defense and host life history. *Am. Nat.* **160**:S9–  
 457 S22.

458 Table 1: Analysis of cox proportional hazards for survivorship post-infection for A.  
 459 *Pseudomonas entomophila* and (B) *Staphylococcus succinus*. (C) Analysis of bacterial  
 460 colony count data (natural log transformed) against *Providencia rettgeri*.

| A. Survivorship against <i>Pseudomonas entomophila</i>             |         |         |    |            |
|--------------------------------------------------------------------|---------|---------|----|------------|
|                                                                    | loglik  | Chisq   | df | Pr(> Chi)  |
| Selection                                                          | -5035.2 | 0.9701  | 1  | 0.325      |
| Mating                                                             | -5011.8 | 46.8518 | 1  | 7.656e-12* |
| Selection × Mating                                                 | -5011.6 | 0.2909  | 1  | 0.59       |
| B. Survivorship against <i>Staphylococcus succinus</i>             |         |         |    |            |
| Selection                                                          | -4377.6 | 3.4314  | 1  | 0.064      |
| Mating                                                             | -4377.6 | 0.0556  | 1  | 0.813      |
| Selection × Mating                                                 | -4377.5 | 0.1624  | 1  | 0.687      |
| C. Bacterial clearance ability against <i>Providencia rettgeri</i> |         |         |    |            |

|                    | Sum Sq | Mean Sq | NumDF | DenDF   | F.value | Pr(>F)    |
|--------------------|--------|---------|-------|---------|---------|-----------|
| Selection          | 0.447  | 0.447   | 1     | 4.7040  | 0.0986  | 0.766948  |
| Mating             | 60.619 | 60.619  | 1     | 15.3587 | 13.3857 | 0.002249* |
| Selection × Mating | 0.126  | 0.126   | 1     | 7.0301  | 0.0279  | 0.872035  |

461

462 **Figure legends:**

463 **Figure 1:** Results of Cox proportional hazards analysis. The curves show survival as a  
464 function of time. The solid line and the dot-dash line represent “mated” treatments of F (FM)  
465 and M (MM) regimes respectively. They have significantly higher survival rate compared to  
466 the “virgin” treatments of F (FV) and M (MV) regimes denoted by dashes and dots  
467 respectively.

468 **Figure 2:** Results of natural log transformed CFU data for mated (Shaded bar) and virgin  
469 (open bar) treatments of M and F regimes which are represented in the x-axis. The error bars  
470 represent 95% confidence intervals. In both selection regimes mated males had significantly  
471 lower colony count than virgins.

472 **Figure 3:** Results of Cox proportional hazards analysis. The curves show survival as a  
473 function of time. The solid line, the dot-dash, the dashes and the dots line represent “mated”  
474 treatments: F- Mated (FM), M – mated (MM), F-virgin (FV) and - virgin (MV) respectively.  
475 There was no differences between any of the treatments.

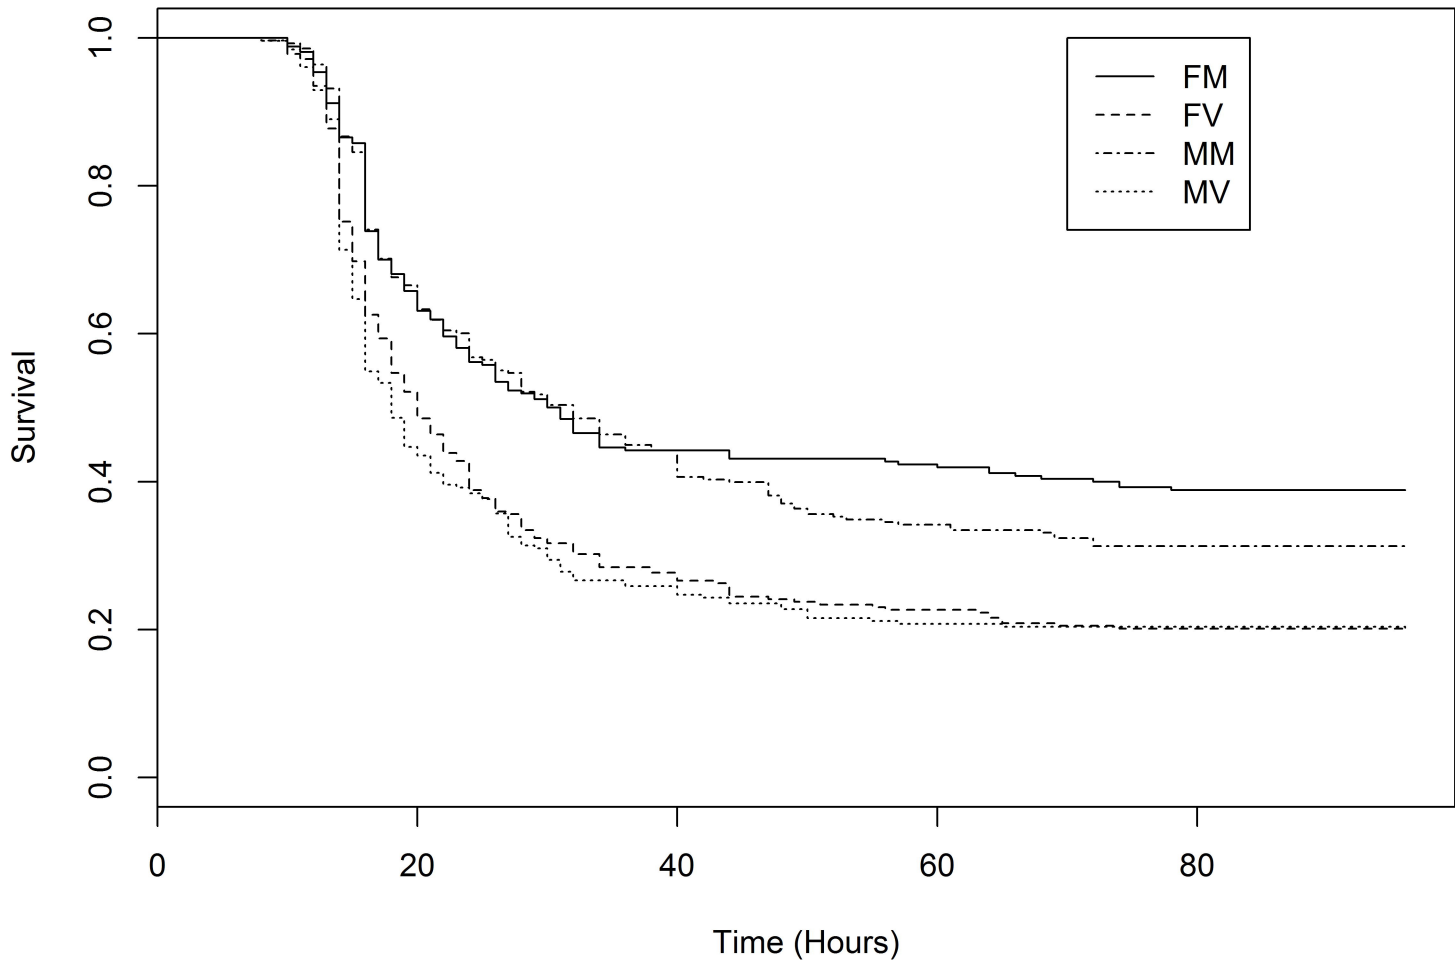

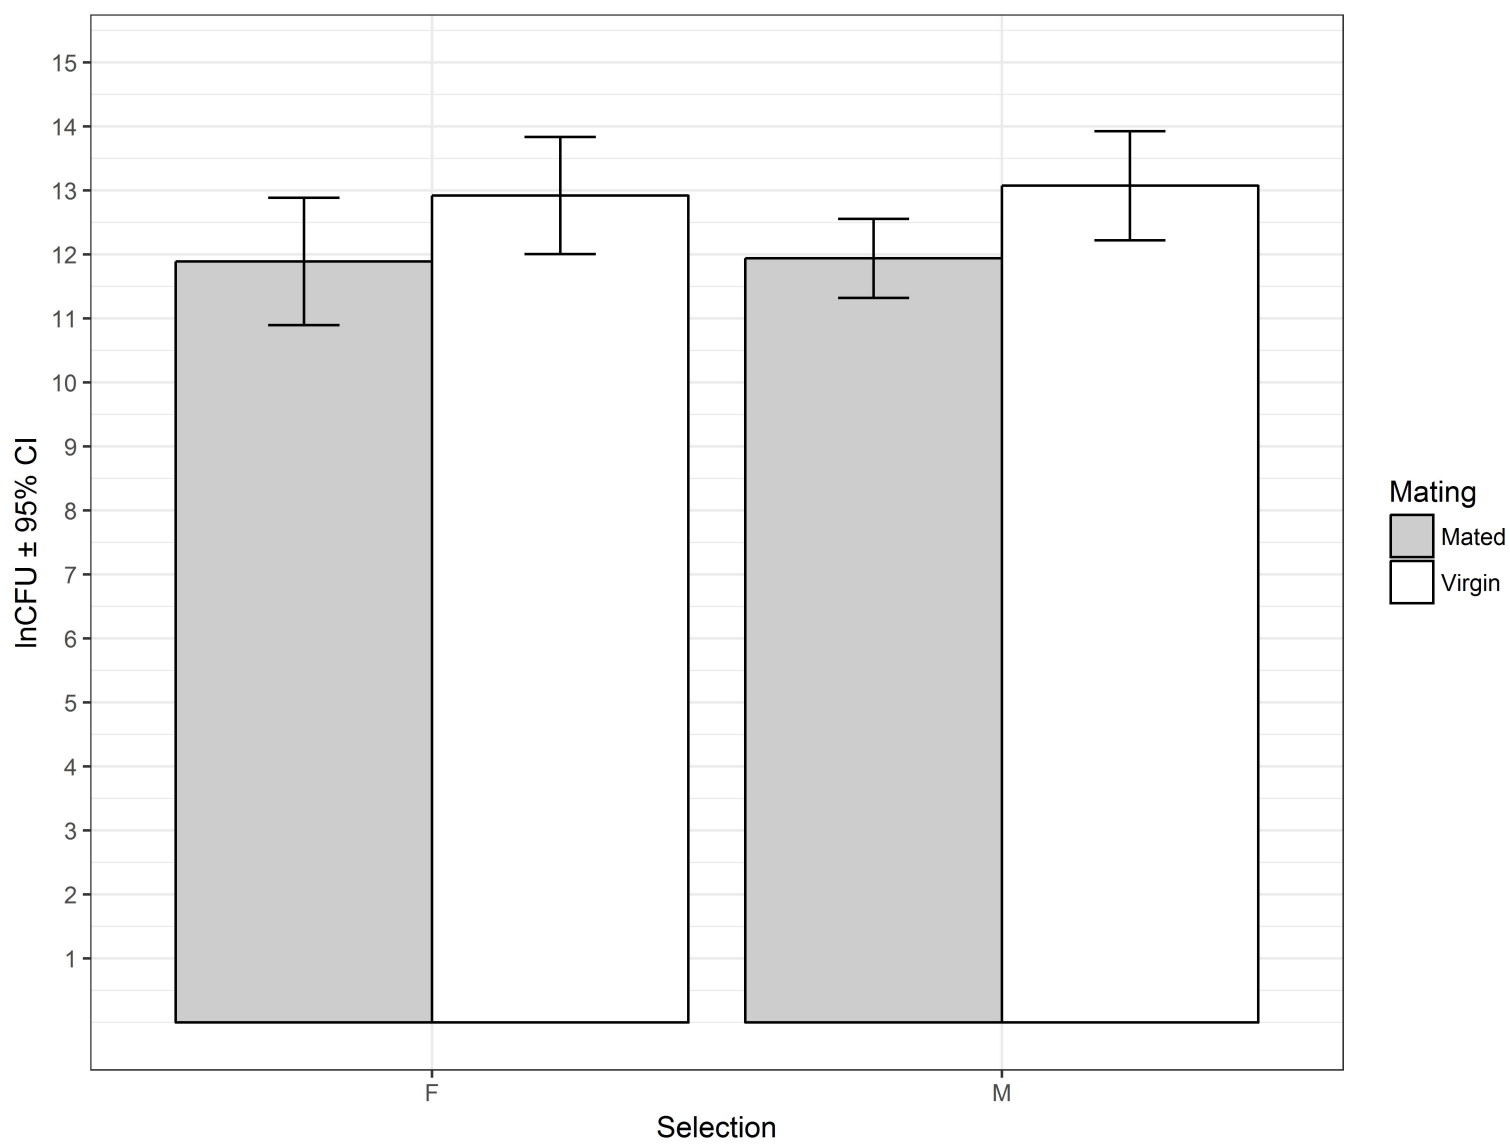

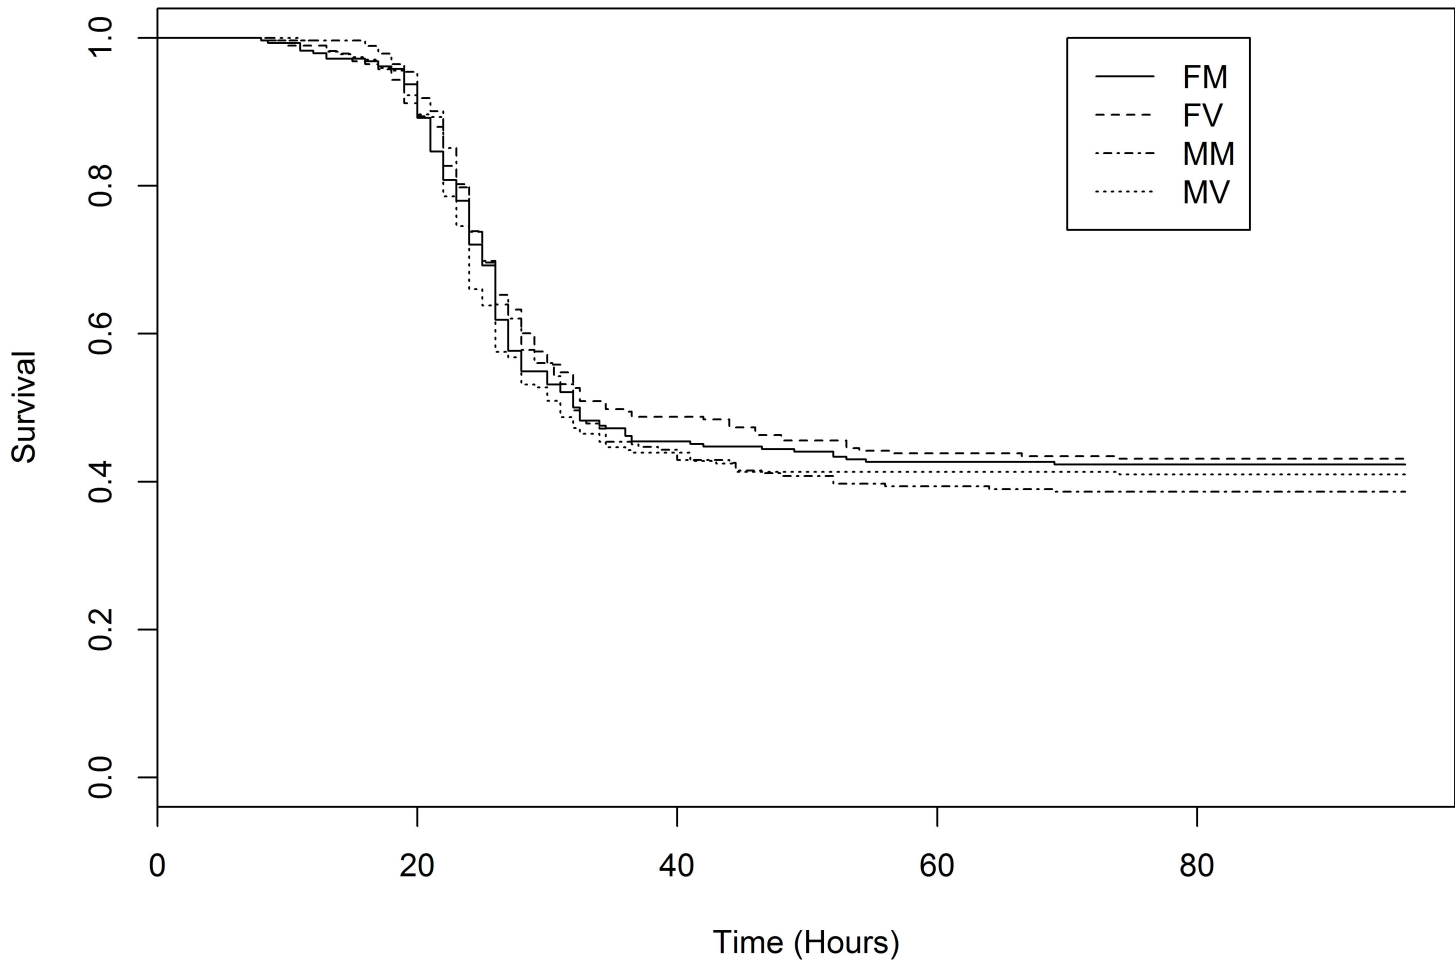

Source: http://biorxiv.org/content/10.1101/144311v1.full.pdf
